1 ***HLF* Expression Defines the Human Hematopoietic Stem Cell State.**

2

3 Bernhard Lehnertz<sup>1, #</sup>, Jalila Chagraoui<sup>1</sup>, Tara MacRae<sup>1</sup>, Elisa Tomellini<sup>1</sup>, Sophie Corneau<sup>1</sup>,  
4 Nadine Mayotte<sup>1</sup>, Isabel Boivin<sup>1</sup>, and Guy Sauvageau<sup>1, 2, 3, #, \*</sup>

5

6 <sup>1</sup>Molecular Genetics of Stem Cells Laboratory, Institute for Research in Immunology and  
7 Cancer, University of Montreal, Montreal QC, H3T 1J4, Canada

8 <sup>2</sup>Division of Hematology, Maisonneuve-Rosemont Hospital, Montreal QC, H1T 2M4, Canada

9 <sup>3</sup>Department of Medicine, Faculty of Medicine, University of Montreal, Montreal QC, H3T 1J4,  
10 Canada

11

12 #correspondence: Bernhard Lehnertz ([bernhard.j.lehnertz@umontreal.ca](mailto:bernhard.j.lehnertz@umontreal.ca)), Guy Sauvageau  
13 ([guy.sauvageau@umontreal.ca](mailto:guy.sauvageau@umontreal.ca))

14

15

16

17

18

19

20

21

22 **Key Points:**

23 • In the human blood system, *HLF* expression is specific to stem cell populations in  
24 primary anatomical sites and during *ex vivo* expansion.

25 • CRISPR/rAAV6-mediated integration of a genomic *HLF*-reporter allows selective and  
26 stable genetic labeling of human HSCs *ex vivo* and *in vivo*.

27 **Abstract:**

28

29 **Hematopoietic stem cells (HSCs) sustain blood cell homeostasis throughout life and are**  
30 **able to regenerate all blood lineages following transplantation.**

31 **Despite this clear functional definition, highly enriched isolation of human HSCs can**  
32 **currently only be achieved through combinatorial assessment of multiple surface**  
33 **antigens. While a number of transgenic HSC reporter mouse strains have been**  
34 **described, no analogous approach to prospectively isolate human HSCs has been**  
35 **reported.**

36 **To identify genes with the most selective expression in human HSCs, we profiled**  
37 **population- and single-cell transcriptomes of fresh and *ex vivo* cultured cord blood**  
38 **derived HSPCs as well as peripheral blood, adult bone marrow and fetal liver. Based on**  
39 **these analyses, we propose the master transcription factor *HLF* (*Hepatic Leukemia***  
40 ***Factor*) as one of the most specific HSC marker genes.**

41 **To directly track its expression in human hematopoietic cells, we developed a genomic**  
42 ***HLF* reporter strategy, capable of selectively labeling the most immature blood cells on**  
43 **the basis of a single engineered parameter.**

44 **Most importantly, *HLF*-expressing cells comprise all of the stem cell activity in culture**  
45 **and *in vivo* during serial transplantation.**

46 **Taken together, these results experimentally establish *HLF* as a defining gene of the**  
47 **human hematopoietic stem cell state and outline a new approach to continuously mark**  
48 **these cells with high fidelity.**

49

50 **Introduction:**

51

52 The existence of rare, serially transplantable and multipotent hematopoietic stem cells (HSCs)  
53 was first demonstrated nearly sixty years ago in mice<sup>1-3</sup>. Since then, HSCs have been studied  
54 extensively not only due to their unique biology but because of their paramount regenerative  
55 potential that is now widely exploited in the clinic<sup>4</sup>.

56 Despite their high clinical relevance, the molecular identity of human HSCs remains poorly  
57 defined and their purification invariably requires profiling of complex stem-cell associated  
58 surface marker combinations<sup>5</sup>. Since many of these surface markers are mediators of cellular  
59 homing or signaling, their expression is often regulated in response to changing physiological  
60 conditions, significantly impacting utility during certain experimental procedures, most notably *ex*  
61 *vivo* culture<sup>6,7</sup>.

62 In mice, several HSC-enriched genes encoding intracellular proteins have been identified and,  
63 using transgenic reporter strains, were demonstrated to label repopulating cells with high  
64 accuracies<sup>8-14</sup>. Collectively, these studies suggest that a number of intracellular proteins,  
65 particularly transcriptional and chromatin regulators, are more specifically expressed than most,  
66 if not all, currently used surface HSC markers.

67 With recent advancements in targeted gene editing using CRISPR and recombinant adeno-  
68 associated viruses (rAAV)<sup>15</sup> and in functional expansion of human HSCs in culture<sup>16-20</sup>, the use  
69 of genetic reporter alleles in these cells has become conceivable. Moreover, improved  
70 characterization of developmental gene expression networks using single cell transcriptomics  
71 has set the stage for population marker gene identification with unmatched resolution. Through  
72 combination of these key advancements, we set out to identify the most selectively expressed  
73 candidate genes in human HSCs and engineer a genomic reporter allowing prospective  
74 identification of *bona fide* human HSCs in culture and *in vivo*.

75

76 **Methods**

77

78 **Analyses of bulk transcriptomes.** EPCR and ITGA3 specific datasets were previously  
79 reported. In brief, differentially expressed genes (DEGs) from the ITGA3 dataset were  
80 determined exactly as in<sup>21</sup> using the Kallisto/Sleuth pipeline and the full GRCh38 v92 annotation  
81 (including non-coding genes). The EPCR dataset<sup>7</sup> was re-analyzed in the same fashion for  
82 consistency. Expression weighted fold-change (beta-value) and p-value (sleuth) cut-off values  
83 were designated based on ITGA3 (beta  $\pm$  0.844; p = 0.0071) and EPCR (beta  $\pm$  1.412; p =  
84 3.32e-7) in the respective datasets. Intersection of positive and negative DEGs yielded 17 and 7  
85 genes respectively. Analyses and heatmaps were generated in R.

86

87 **Analyses of single cell transcriptomes from fresh and UM171 expanded cord blood.**

88 CD34<sup>+</sup> cord blood (CB) cells, either freshly thawed or culture-expanded with UM171 (35nM)  
89 were single-cell sequenced on a Chromium Single-Cell Controller (10X Genomics) using the  
90 Single Cell 3' Reagent Kit version 2 according to manufacturer's instructions. Target cell  
91 numbers were 6,000 per condition. scRNAseq libraries were sequenced on an Illumina  
92 NovaSeq device using a S2 (PE 28x91) setup or on an Illumina HiSEQ 4000 using 26x98  
93 cycles. A standard Cellranger v3.0.1 pipeline was used for read mapping (GRCh38 annotation)  
94 and demultiplexing. Subsequent analyses were done in Seurat (v3) based on Cellranger  
95 prefiltered barcode/feature matrices and included (i) exclusion of cells with less genes or UMIs  
96 than the respective medians minus 2 standard deviations (ii) exclusion of cells with more genes  
97 or UMIs than the respective medians plus 2 standard deviations (multiplets), (iii) exclusion of  
98 cells with more than 7% mitochondrial gene expression (apoptotic cells). Expression counts  
99 were normalized using the SCTransform wrapper in Seurat including regression on cell cycle  
100 scores and mitochondrial gene content. Seurat integration was performed using the top 241  
101 integration anchors (250 minus sex specific genes) in the first 30 dimensions, followed by PCA

102 dimensional reduction, FindNeighbors and FindClusters (resolution = 0.5) in the first 15  
103 integrated dimensions. SPRING embedding was calculated on the integrated expression matrix  
104 using the SPRING webtool (<https://kleintools.hms.harvard.edu/tools/spring.html>). For  
105 visualization, data imputation was calculated on SCT transformed data of all genes using the  
106 MAGIC wrapper (t = 1) in Seurat.

107

108 **CD34<sup>+</sup> enriched cord blood cell culture.** Culture of isolated human CB-derived CD34+ cells  
109 was performed in HSPC expansion media comprised of Stem Span serum-free media  
110 (StemCell Technologies #09855) supplemented with Glutamax (Invitrogen #35050061), low  
111 density lipoprotein (StemCell Technologies #02698), 100 ng/ ml SCF (Shenandoah  
112 Biotechnology #100-04), 100 ng/ml Flt3L (Shenandoah Biotechnology #100-21), 50 ng/ml TPO  
113 (R&D system #288-TP) and 35 nM UM171 (StemCell Technologies #72914).

114

115 **Nucleofection and transduction of CD34<sup>+</sup> cells.** Nucleofection of was carried out with 3ug  
116 Cas9 and 8ug of sgRNA and 10e6 cells per 100 ul, using the DZ100 program. 4 days before  
117 nucleofection, CD34+ cells were thawed and plated at 1.5\*10e5 cells/ml in HSPC expansion  
118 media containing UM171 (35 nM). At day 3, cells had typically expanded 2-3fold, and were  
119 stained with anti-CD34-BV421 (BD #562577, 1:50) and anti-CD201-APC (Biolegend #351906,  
120 1:100) and sorted based on CD201 expression. The sorted cells were plated back in culture at  
121 1.5\*10e5 cells/ml. 24h later, cells were harvested, washed in PBS and taken up in 1M  
122 nucleofection buffer containing 11ug the pre-assembled Cas9 sgRNA RNP complex and were  
123 indicated 20 fmol of siRNA against TP53 (ThermoFisher #4390825, siRNA id s605). After  
124 nucleofection, the cells were immediately plated at 2-4\*10e5 cell per ml in HSPC media  
125 optionally containing 400 MOIs of reporter encoding rAAV6. Half media changes were done on  
126 days 5 and 6, analysis or transplantation was done on day 7.

127

128 **Assessment of homologous recombination using droplet digital PCR (ddPCR).** Primers  
129 were designed to amplify a 605bp region of the wildtype or 601bp region of the targeted allele  
130 using a set of 3 primers. A common external forward primer (ext\_FW; 5'-  
131 CCACCTGCTTTCATCCAGC-3') binds in intron 3 upstream of the left homology arm, while the  
132 reverse primer binds either in the right homology arm (3'\_RV; 5'-  
133 GGTAAGTGCTGATGTCAGAAAGG-3') or in the IRES region of the reporter (ires\_RV; 5'-  
134 TAACATATAGACAAACGCACACCG-3'). The 3'\_RV primer binds 77bp downstream of the  
135 Cas9 cut site, thus amplifying most non-integrated alleles. A FAM labeled non-fluorescent  
136 quencher dual-labeled probe (HLF\_common\_FAM\_probe; 5'-FAM-  
137 TCTGATCTCTGCTTCACTGAGCACGC-ZEN-lowa-black-3') binds the HLF locus within the left  
138 homology arm and as such will detect both the wildtype and targeted allele amplicons. A  
139 second probe labelled with HEX and non-fluorescent quencher (ires\_HEX\_probe; 5'-HEX-  
140 CAAGCGGCTTCGGCCAGTAACGTTAG-ZEN-lowa-black-3') binds in the IRES cassette and  
141 will detect only targeted allele amplicons. PCR efficiency and specificity were validated in  
142 standard PCR assays prior to ddPCR using synthetic gBlock DNA fragments consisting of  
143 synthetic wildtype or targeted alleles, combined with primer drop-out testing. Oligonucleotides  
144 and gBlocks were synthesized by IDT. To assess targeting of the HLF locus following  
145 electroporation and in xenograft recipients, approximately 30,000 cells were lysed in 25ul Quick  
146 Extract Buffer (Lucigen #QE09050), according to the manufacturer's directions. Briefly, cells  
147 were pelleted and resuspended in lysis buffer, then heated at 65° for 6min, vortexed and  
148 incubated for 2min at 95°. For cell line experiments with a larger cell numbers, the amount of  
149 lysis buffer was scaled up accordingly. 22ul ddPCR reactions contained 2.2ul of cell lysate,  
150 11ul of 2X ddPCR Supermix for Probes (No dUTP, BioRad #1863024), 1.1ul (4U) FastDigest-  
151 HindIII (prediluted 1/3) (Thermo Fisher) and 11.1ul 20X primer-probe mix. Final concentration  
152 of primers and probes were 0.25uM and 0.9uM each, respectively. ddPCR reaction emulsion  
153 was created in a DG8 cartridge with DG8 gasket (BioRad #1863009) from 20ul PCR mix and

154 70ul droplet generation oil for probes (BioRad #1863052), using a QX200 Droplet Generator  
155 (BioRad #1864002). 40ul of PCR emulsion was pipetted into a 96-well QX200 compatible PCR  
156 plate (BioRad #12001925), which was covered with a Pierceable Foil Heat Seal and sealed in a  
157 PX1 PCR plate sealer (BioRad #1814000) before cycling in a C1000 deep-well thermocycler  
158 (BioRad #1851197). Thermocycler conditions were as follows: 95°C for 10min; 50 cycles of  
159 30sec at 95°C, 2min at 58°C, 2min at 72°C, followed by 10 min at 98°C, with a ramp speed of  
160 2°C / step throughout. ddPCR products were measured using a QX200 Droplet reader (BioRad  
161 #1864001). Amplitude and Cluster data was exported from QuantaSoft Software (BioRad  
162 #1864003) and analyzed in R using the ddPCR package.

163

164 **Data Availability.** The accession numbers for the previously published datasets are as follows:  
165 EPCR population dataset (GSE77128), ITGA3 population dataset (GSE130974), the human  
166 bone marrow single cell dataset is available through the Human Cell Atlas consortium and was  
167 downloaded as count matrix through the HCADData portal in R  
168 (<https://github.com/federicomarini/HCADData>). The human fetal liver dataset was obtained as  
169 annotated count matrix from Muzlifah Haniffa or else is available at ArrayExpress with  
170 accession code E-MTAB-7407. Fresh and UM171-expanded CD34+ single-cell datasets have  
171 been deposited to GEO under accession GSE153370.

172 **Additional methods.**

173 All additional methods are provided in the supplemental Data.

174

175

176 **Results**

177

178 ***Hepatic Leukemia Factor (HLF)* is a candidate marker gene for human HSC populations.**

179

180 We previously identified surface markers such as EPCR (CD201) and ITGA3 (CD49c) that best  
181 define long-term repopulating cells in optimized *ex vivo* CD34<sup>+</sup> cord blood stem cell expansion  
182 conditions<sup>7,21</sup>.

183 Integrated transcriptome analysis of these enriched (CD34<sup>+</sup>/CD201<sup>+</sup> and  
184 CD34<sup>+</sup>/CD45RA<sup>low</sup>/CD201<sup>+</sup>/CD90<sup>+</sup>/CD133<sup>+</sup>/ITGA3<sup>+</sup>) versus depleted LT-HSC populations  
185 yielded a set of genes (n=17) with strongly LT-HSC-associated expression (**Supplemental Fig.**  
186 **S1**). Based on expression dynamics between LT-HSCs and differentiated cells, *Hepatic*  
187 *Leukemia Factor (HLF)* ranked highest in this list and was therefore prioritized as an HSC  
188 marker candidate (**Fig. 1A**). Indeed, *HLF* was found not expressed in mature peripheral blood  
189 cells<sup>22</sup> (**Fig. 1B**) and single-cell transcriptomes of freshly isolated and culture-expanded CD34<sup>+</sup>  
190 cord blood cells confirmed its expression in the hematopoietic stem and progenitor cell (HSPC)  
191 cluster (**Fig. 1C, pink cluster and Fig. 1D and E**). Moreover, within this cluster, *HLF*  
192 expression continuously decreased as cells progressed towards lineage commitment, a pattern  
193 that aligns with latest models of gradual rather than stepwise HSC differentiation<sup>23,24</sup>.

194 Next, we benchmarked the expression of *HLF* against (i) HSC-associated genes we and others  
195 identified (*AVP*<sup>25</sup>, *MLLT3*<sup>26</sup>) or that have previously been characterized in mice (*PRDM16*<sup>27</sup>,  
196 *GATA3*<sup>8</sup>, *HOXB5*<sup>11</sup>, *MEIS1*<sup>12</sup>, *MECOM*<sup>14</sup>, *FGD5*<sup>9</sup> and alpha-Catulin (*CTNNAL1*)<sup>10</sup>), as well as  
197 against (ii) surface markers commonly used to prospectively isolate human HSCs (*CD34*<sup>28</sup>,  
198 *CD201 (PROCR)*<sup>7</sup>, *CD49c (ITGA3)*<sup>21</sup>, *CD133 (PROM1)*<sup>29</sup>, *CD90 (THY1)*<sup>30</sup> and *CD49f (ITGA6)*<sup>31</sup>)  
199 (**Fig. 1F and Supplemental Fig. S2**). While varying degrees of HSPC-enriched expression  
200 were detectable for most of these genes (**pink density profiles in Fig. 1F and Supplemental**  
201 **Figure S2, Supplemental Tables T1 and T2**), *HLF*, *AVP*, *GATA3*, *MEIS1*, *HOXB5*, *MLLT3* and



202 *MECOM* displayed the most specific expression within HSPCs of freshly purified human CD34<sup>+</sup>  
203 cord blood cells (**Fig. 1F, left panels**). Of note, these genes generally performed better than  
204 HSC-associated surface antigens, consistent with the requirement to stain for several of these  
205 markers in combination to achieve high HSC enrichment. In seven-day UM171-supplemented  
206 cultures, *HLF*, *AVP*, *PRDM16* and *GATA3* exhibited the highest HSPC enrichment (**Fig. 1F,**  
207 **right panel**).

208 To extend our analysis to different developmental and physiological contexts, and to assess  
209 specificity in a larger diversity of hematopoietic lineages and intermediates, we examined public  
210 single cell transcriptomic datasets of adult bone marrow<sup>32</sup> (**Fig. 1G-I and Supplemental Fig.**  
211 **S3A**) and fetal liver<sup>33</sup> (**Fig. 1J-L and Supplemental Fig. S3B**), each aggregating more than  
212 100,000 cells from several bio-informatically integrated specimens. These analyses revealed  
213 that *GATA3* is also expressed in innate-lymphoid cells (ILC), T-cells and NK cells and *PRDM16*  
214 expression in embryonic lymphoid/T-lymphoid precursors and NK cells, eliminating these genes  
215 from further consideration (**Fig. 1I and 1I and Supplemental Fig S3A and B**).

216 Among hematopoietic cells in the adult bone marrow and fetal liver datasets, *HLF* exhibited  
217 pronounced HSPC-restricted expression and only negligible expression in a small subset of  
218 naïve T-cells in adult bone marrow (**Fig. 1H**). In non-hematopoietic cells, *HLF* expression was  
219 detectable in the stromal fraction of adult bone marrow, as well as in fetal liver fibroblasts and  
220 hepatocytes (**Fig. 1G-I**).

221 While *Arginine Vasopressin (AVP)* exhibited a similar expression profile as *HLF* in these  
222 analyses, we focused on *HLF* for downstream experiments based on its reported function in  
223 HSCs<sup>34-36</sup>.

224 In summary, *HLF* is a gene with highly selective expression in HSC-enriched sub-populations  
225 across their most relevant anatomical and ontogenetic sources. As such, it can be regarded as  
226 an attractive candidate gene to mark human hematopoietic stem cells independent of  
227 developmental or environmental (e.g. *ex vivo* culture) context.

228

## 229 **Engineering of a genomic *HLF*-reporter transgene in human cells.**

230

231 We reasoned that *HLF*-expression, if visualized genetically, could provide a specific readout to  
232 identify immature human blood cells. To this end, we devised a strategy to introduce a  
233 fluorescent reporter cassette into the endogenous *HLF* locus using nucleofection of a  
234 Cas9/sgRNA ribonucleoprotein complex and delivery of a homologous recombination (HR)  
235 template by recombinant adeno-associated virus (rAAV6) transduction<sup>37</sup>. To maintain *HLF*  
236 protein function, we targeted the 3' end of the *HLF* open reading frame (**Fig. 2A and**  
237 **supplemental Fig. S4**). Several HR templates were designed to either knock-in an in-frame  
238 P2A-ZsGreen (ZsG) cassette or an IRES-ZsGreen cassette to capture endogenous *HLF*  
239 expression (**Supplemental Fig. S5**). Functional assessment in *HLF*-expressing HepG2 cells  
240 indicated that constructs with IRES-ZsGreen and either a P2A-linked Puromycin resistance or  
241 truncated EGFR<sup>38</sup> yielded the highest reporter expression (**Supplemental Fig. S5D and E**).

242 Further validation of the reporter construct (**Fig. 2A**) in HepG2 and HEK293 cells revealed that  
243 only cognate pairing of guide RNA and repair template (**Fig. 2B**) resulted in targeting to the *HLF*  
244 locus, as demonstrated by droplet digital PCR (ddPCR) designed to detect the integrated but  
245 not the episomal reporter cassette (**Fig. 2C**). Importantly, targeted reporter integration resulted  
246 in stable ZsG expression in HepG2 but not in HEK293 cells (**Fig. 2D**), thus recapitulating  
247 endogenous *HLF* expression levels (**Fig. 2E**). These results not only provided proof-of-principle  
248 of the experimental approach but also demonstrated reporter functionality and selectivity.

249 We next assessed HR efficiency to the *HLF*-locus in cord blood derived HSPCs using reported  
250 settings<sup>37</sup>. To this end, we used a rAAV6 HR template which contained a constitutive Ubiquitin C  
251 (UbC) promoter driven Ametrine fluorescent protein cassette (**Supplemental Fig. S5A and**  
252 **S6A**). Since this promoter drives high expression after genomic integration but not from  
253 episomal rAAV vectors<sup>39</sup>, it provided a direct readout of insertion into the CRISPR-targeted *HLF*-

254 locus. Indeed, we observed up to 55% of cells with high Ametrine expression in sgHLF/Cas9  
255 RNP but not in mock electroporated cells indicative of targeted integration (**Supplemental Fig.**  
256 **S6B and S6C**). CD34 profiles were comparable between Ametrine positive and negative  
257 populations, suggesting largely uniform targeting efficiencies (**Supplemental Fig. S6B**).  
258 Notably, elevated rAAV6 concentrations resulted in marked cell toxicity, necessitating careful  
259 titration (**Supplemental Fig. S6C**).

260 We next tested the promoterless *HLF* reporter construct (**Fig. 2A and Supplemental Fig. S5D**)  
261 in CD34<sup>+</sup> cells which, after 3 days of pre-expansion with UM171, were divided into HSC-  
262 enriched and depleted populations based on high or low CD201 surface expression,  
263 respectively<sup>7</sup> (**Fig. 2F and G**). These sub-fractions, as well as unsorted (bulk) cells were  
264 expanded for an additional 24h, electroporated with Cas9/sgHLF RNP and transduced with the  
265 repair template encoding rAAV6 over a range of virus-to-cell ratios (multiplicity of infection,  
266 MOI100-1000). Finally, after three additional days of HSC-supportive culture, ddPCR and FACS  
267 analysis to evaluate HR efficiencies and reporter expression was performed (**Fig. 2F**).

268 Within corresponding experimental conditions, allelic HR frequencies were similar between bulk,  
269 HSC-enriched and depleted fractions and reached a maximum of ~50% with the highest tested  
270 rAAV6 virus titer of MOI1000 (**Fig. 2H top panels**). Strikingly, while HSC-depleted CD201-  
271 cultures gave rise to no ZsG<sup>+</sup> cells (**Fig. 2H bottom right panel**) despite successful HR,  
272 reporter expressing cells were readily detectable in all other rAAV6-containing conditions (**Fig.**  
273 **2H bottom panels**). In essence, pre-enrichment of CD201<sup>+</sup> cells and rAAV6 transduction at  
274 MOI400 yielded the highest number of ZsG<sup>+</sup> cells among all tested conditions (**Fig. 2H centre**  
275 **bottom panel**), although HR reached only intermediate levels with these parameters. This  
276 suggested rAAV6 toxicity for *HLF*-expressing cells at lower MOI compared to bulk cultures (**Fig.**  
277 **2h middle panels and Supplemental Fig. S6C**).

278 Since Cas9/sgRNA electroporation impacted the overall cell recovery at day seven compared to  
279 untreated controls (**Fig. 2H middle panels**), we next tested whether transient p53 inhibition  
280 could partially alleviate this effect as suggested<sup>40</sup>.  
281 Although co-electroporation of synthetic siRNA against p53 did not increase overall HR  
282 efficiency (**Fig. 2I, top left panel**), it resulted in more than threefold enhanced recovery of *HLF*-  
283 *ZsG* expressing cells (**Fig. 2I, left bottom panel**). While total cell numbers improved only  
284 marginally by transient p53 knock-down (**Fig. 2I, left middle panel**), a significantly more  
285 pronounced effect was detectable in immature HSPC subsets defined by surface marker  
286 expression (**Fig. 2I, right panels with increasing HSC enrichment from top to bottom**).  
287 These observations were in line with a report suggesting that nuclease-mediated gene editing  
288 results in p53-dependent proliferation arrest and functional impairment of the most immature  
289 HSPCs, and that transient p53 inhibition can partially overcome this effect<sup>40</sup>.  
290 In summary, these experiments established a robust experimental approach to visualize  
291 endogenous *HLF*-expression through targeted genomic integration of a fluorescent reporter  
292 cassette in human cell lines and more importantly, in cord blood HSPCs.

293

#### 294 **Selective *HLF*-transgene expression in immunophenotypic human LT-HSCs.**

295

296 Next, we aimed to validate expression of the *HLF*-*ZsG* reporter in the context of stem cell  
297 specific surface marker panels adapted for cultured cord blood cells<sup>7,21</sup>.  
298 Using the established conditions described above, ~20% targeted allele frequencies were  
299 observed in CD201<sup>-</sup> and CD201<sup>+</sup> sorted cells (**Fig. 3A**), resulting in an average of 1.17%  
300 reporter expression specific to CD201<sup>+</sup> sorted cells (**Fig. 3B and C**). Strikingly, reporter-positive  
301 cells largely expressed LT-HSC surface phenotypes defined by characteristic combinations of  
302 CD34, CD45RA, CD201, CD90 and ITGA3 (**Fig. 3d and e**). Dimensionality reduction of these  
303 surface marker and *HLF*-*ZsG* expression profiles indicated that *HLF*-*ZsG* expression defined a

304 concise sub-population which clustered inside increasingly restricted immuno-phenotypically  
305 defined HSC populations (**Fig. 3F**). As expected, *HLF-ZsG* transgene expression increased  
306 within progressively restrictive HSC surface marker gates but only reached a maximum of 8%  
307 within the CD34<sup>+</sup>CD201<sup>+</sup>CD90<sup>+</sup>ITGA3<sup>+</sup> population (**Fig. 3G and H**). Under consideration of the  
308 20% targeted allele frequency, this suggested that HLF-expressing cells indeed represent only a  
309 fraction of this sub-population.

310 These results suggested that *HLF-ZsG* expression *per se* has the potential to surrogate multi-  
311 parametric FACS analysis to identify the most immature cells in *ex vivo* cord blood cell cultures.

312

### 313 ***HLF* expression identifies repopulating cells in CD34<sup>+</sup> cord blood cultures.**

314

315 To test the ability of the reporter to identify functional HSCs, we sorted and transplanted either  
316 bulk *HLF-ZsG* targeted (**Fig. 4A, black colour code**), reporter expressing (**Fig. 4A, green**) or  
317 non-expressing sub-populations (**Fig. 4A, blue**) of CD201 pre-enriched HSPCs. To control for  
318 adverse effects of the targeting procedure, two additional cohorts received either untreated  
319 parental cells (**Fig. 4A, red**) or cells electroporated with a neutral guide RNA (sgAAVS1) (**Fig.**  
320 **4A, purple**). Importantly, transplanted cell doses were proportional of reporter positive versus  
321 negative subsets in the total targeted population (**summarized in Fig. 4B**).

322 We assessed the engraftment potential of these cells in transplanted NSGS recipients at short  
323 (3 weeks), intermediate (9 weeks) and long-term (16 weeks) timepoints. Even though at least  
324 25-fold fewer *HLF-ZsG* expressing cells were transplanted compared to reporter non-expressing  
325 or total *HLF-ZsG* targeted cells, comparable reconstitution levels (**Fig. 4C**) and similar lineage  
326 contributions (**Fig. 4D**) were achieved in these cohorts. Furthermore, we observed similar levels  
327 of human hematopoietic chimerism between sgAAVS1 controls and *HLF-ZsG* targeted  
328 recipients, indicating that genetic manipulation of the *HLF* locus has little functional impact on

329 HSC activity beyond what can be attributed to RNP electroporation and rAAV6 transduction  
330 **(Fig. 4C first three panel columns).**

331 While these results suggested a strong enrichment for reconstitution activity in reporter  
332 expressing cells based on transplanted cell doses, we additionally traced the engineered  
333 reporter allele in transplanted recipients by ddPCR to test whether human engraftment in the  
334 reporter non-expressing cohort had mainly emerged from non-targeted HSCs. Indeed, this was  
335 confirmed by the observation that HR allele ratios of 24.6% in the reporter non-expressing  
336 fraction at transplantation **(Fig. 4E, blue)** dropped sharply in the progeny of these cells *in vivo*  
337 **(Fig. 4F and G)**. On the contrary, HR allele frequencies remained largely stable between pre-  
338 and post-transplantation timepoints in both total targeted and sorted reporter positive  
339 populations. Strikingly, HR allele frequency reached 88.5% in the *HLF-ZsG* expressing fraction  
340 indicating that most of these cells carried bi-allelic reporter integration **(Fig. 4E)**.

341 Taken together, these results demonstrated that reporter-visualized *HLF*-expression is able to  
342 identify multipotent cells with high *in vivo* regenerative potential in CD34<sup>+</sup> cord blood cell  
343 cultures.

344

345 ***HLF*-expression labels HSCs with extensive self-renewal capacity.**

346

347 At three weeks post-transplantation, a well-defined reporter positive sub-fraction within CD34-  
348 high bone marrow cells was detectable in recipients transplanted with total or ZsG-positive *HLF*-  
349 ZsG targeted cells but was entirely absent in ZsG-negative recipients **(Fig. 5A)**. To test whether  
350 *HLF* expression continued to label stem cells after transplantation, we selected three *HLF-ZsG*  
351 targeted ZsG<sup>+</sup> primary recipients with detectable ZsG<sup>+</sup> cells at week 10.5 **(Fig. 5B)** and high  
352 (>96% each) HR allele ratios **(Fig. 4F)** as donors for secondary transplantation. We first  
353 magnetically enriched CD34<sup>+</sup> cells from the pooled bone marrow of these donors and then  
354 sorted reporter-expressing cells as well as a corresponding population that expressed similar

355 CD34 levels but was 16.6-fold more abundant. Corresponding cell numbers of these  
356 populations (900 and  $1.5 \times 10^4$ , respectively) were intra-hepatically transplanted into newborn  
357 secondary recipient mice (**Fig. 5C**). Significant differences in human engraftment between HLF-  
358 ZsG<sup>+</sup> and CD34<sup>high</sup>/HLF-ZsG<sup>-</sup> secondary recipients were observed at short-term, intermediate  
359 and long-term post-transplantation timepoints (**Fig. 5D**). More specifically, while all HLF-ZsG<sup>-</sup>  
360 secondary recipients were characterized by low-level and transient reconstitution, pronounced  
361 and multi-lineage human chimerism was detectable in at least four of ten HLF-ZsG<sup>+</sup> recipients  
362 as long as 16 weeks post-transplantation (**Fig. 5D and E**).

363 Based on these observations, we conclude that in addition to labeling human HSCs *ex vivo*,  
364 *HLF* expression continues to mark hematopoietic stem cells with extensive reconstitution activity  
365 *in vivo*. These results thus demonstrate the potential of *HLF* reporter transgenesis to visualize  
366 human blood stem cells in real-time under experimental conditions.

367

## 368 **Discussion:**

369

370 With the aim to develop an approach to directly mark the rare stem cell fraction within the  
371 human blood system, we identify *HLF* as one of the most selectively expressed gene in human  
372 HSCs, corroborating its reported roles in the transcriptional regulation of HSC self-renewal and  
373 multipotency in mice<sup>34,35</sup>. Interestingly, in addition to these endogenous activities, ectopically  
374 expressed HLF can impart self-renewal to differentiation-committed blood cells through its DNA  
375 binding activity, either in the context of recurrent chromosomal fusions with *TCF3* in t(17;19)  
376 acute B-lymphoblastic leukemia<sup>41</sup> or as a reprogramming factor in murine induced  
377 hematopoietic stem cells<sup>42</sup>, suggesting a role as a central master transcription factor in HSCs.  
378 Transgenic labeling of mouse HSCs has only recently been used to study these cells in their  
379 physiological and anatomical contexts during development<sup>13</sup> and in the adult<sup>10-12,14</sup>.



380 With this study, we provide the first demonstration of transgenic labeling of human HSCs to  
381 date. Our approach builds directly on recently established methodology allowing precise genetic  
382 manipulations in human HSCs *ex vivo*<sup>43</sup>. Nonetheless, a number of challenges that equally  
383 affect therapeutic and experimental gene editing in HSCs remain. These challenges are  
384 primarily connected to the functional impact of both the delivery (e.g. electroporation, immune  
385 response to HR templates and sgRNA)<sup>44,45</sup> and activities of the editing machinery (DNA double  
386 strand breaks)<sup>40,46</sup> and represent important areas of investigation to optimize targeted gene  
387 therapies in stem cells.

388 An additional limitation of the presented strategy is that a significant fraction of HSCs remains  
389 untargeted and therefore escapes labeling. Introduction of a constitutive marker cassette in the  
390 HR template has the potential to circumvent this shortcoming but poses the risk of  
391 transcriptional interference with the targeted gene, as observed (**Supplemental Fig. S5**).

392 Notwithstanding these limitations, we provide a directly quantifiable platform to optimize gene  
393 editing in human HSCs under function-preserving conditions. Moreover, quantitative readout of  
394 the human HSC reporter will likely find utility in efforts to further optimize human HSC expansion  
395 conditions, either through screening for pharmacological self-renewal agonists or through  
396 systematic optimization of media composition and overall culture design.

397

398 **Acknowledgments.** We thank Keith Humphries, Julie Lessard and Trang Hoang for critical  
399 reading of the manuscript, Annie Gosselin and Angelique Bellemare for assistance in FACS  
400 sorting, Melanie Frechette and Valérie Blouin-Chagnon for assistance with mouse experiments,  
401 and Mike Tyers for providing access to nucleofection equipment.

402

403 **Author contributions.** B.L.: project conception, designed and performed all experiments,  
404 experimental and bioinformatic data analyses and interpretation, generated all figures, wrote  
405 manuscript; J.C. and E.T.: technical setup and assistance with CD34+ cell culture and FACS



406 experiments, interpretation of results; T.M. designed and assisted with ddPCR analyses; S.C.,  
407 I.B.: assistance with CD34+ cell purification and banking; N.M.: assistance with CD34+ cell  
408 purification, banking and mouse experiments; G.S.: project supervision and coordination,  
409 experimental design, interpretation of results and manuscript preparation.

410

411 **Competing interests.** The authors declare no competing interests.

412 **Figure legends:**

413

414 **1) Specific *HLF* Expression in Enriched Human HSC Populations.**

415 **A) *HLF* expression is enriched in cultured human HSC subsets.** Differentially expressed  
416 genes from CD201+<sup>7</sup> and ITGA3/CD201+<sup>21</sup> HSC-enriched population transcriptomes were  
417 intersected to identify consistently up or downregulated genes. Ranking based on fold-change  
418 between the most enriched (ITGA3<sup>+</sup>/CD201<sup>+</sup>) and most depleted (CD201<sup>-</sup>) HSC populations is  
419 summarized by a waterfall plot (left, log<sub>2</sub>-transformed). Range of expression is provided for  
420 each gene in square brackets (TPM = transcripts per kilobase million). Each population includes  
421 biological replicates represented along the x-axis.

422 **B) *HLF*-expression is undetectable in blood leukocyte populations.** Curated dataset from  
423 <sup>22</sup>, between 4 and 6 biological replicates per population.

424 **C) Single cell transcriptomic overview of cord blood cell populations.** Fresh and UM171-  
425 expanded CD34<sup>+</sup> (d7) (2 biological replicates for each condition, 15,921 cells total), were scRNA  
426 sequenced (10X Chromium), integrated and clustered using Seurat <sup>347</sup>). Ten cell clusters were  
427 identified: hematopoietic stem/progenitor cells (HSPC), lymphoid-primed multipotent progenitors  
428 (LMPP), multipotent progenitors (MPP), granulo-monocytic progenitor (GMP), megakaryocyte-  
429 erythroid-mast cell progenitors (MEMP), megakaryocytes (mega), eosinophil/basophils (eo/ba),  
430 mast cells (mast), erythroid lineage cells, neutrophils (neutro) and monocytic/dendritic cells  
431 (mono/dc). Dimensional reduction was calculated using SPRING <sup>48</sup>.

432 **D-E) HSPC specific *HLF* expression in fresh CD34<sup>+</sup> cells and after 7d ex vivo expansion in**  
433 **the presence of UM171.** *HLF* expression is shown in single cell transcriptomes split up by  
434 treatment. Normalized expression data (z-score, after MAGIC imputation<sup>49</sup>) is expressed in color  
435 scale.

436 **F) Comparison of *HLF* expression specificity** versus selected HSC-associated genes and  
437 common HSC surface marker genes. Gene-wise z-score distribution by treatment (fresh CD34+

438 and UM171 d7) is represented as density for each cell community (same color-code as in Fig.  
439 1C). Mean z-score for HLF in HSPC cluster is provided as dotted reference line for each  
440 treatment.

441 ***G-I) HLF expression is strongly enriched in HSC clusters in human bone marrow.***

442 ***G) Overview of cell clusters.*** (Human Cell Atlas; 101,935 cells; integrated data from eight  
443 donors, UMAP reduction; preprocessed data, clusters and labels adopted from <sup>32</sup>).

444 ***H) HLF expression.*** (z-score normalized, after MAGIC imputation).

445 ***I) Expression summary of selected HSC-associated genes in human bone marrow.***

446 (scaled expression averaged for each hematopoietic cell population and donor (n=8) in the  
447 dataset, row-normalized color scale).

448 ***J-L) HLF expression is restricted to HSC/MPP cluster in hematopoietic human fetal liver***  
449 ***cells.***

450 ***J) Overview of cell communities.*** (Human Cell Atlas; 113,063 cells; integrated data from 14  
451 fetal livers across four developmental stages, UMAP reduction; preprocessed data, clusters and  
452 labels adopted from<sup>33</sup>). Mac, macrophage; Neut-my, neutrophil–myeloid; Mono-mac, monocyte-  
453 macrophage; Early L/TL, early lymphoid/T lymphocyte; pro., progenitor.

454 ***K) HLF expression*** (z-score normalized, after MAGIC imputation).

455 ***L) Expression summary of HSC-associated genes in fetal liver*** (scaled expression was  
456 averaged for each hematopoietic cell population and four gestation stages (7-8, 9-11, 12-14 and  
457 15-17 post-conception weeks), row-normalized color scale).

458

459 **2) Engineering of a Human Genomic HLF-Reporter.**

460 ***A) Outline of the HLF-reporter targeting strategy using CRISPR/Cas9 and rAAV6.*** A site-  
461 specific DSB at the HLF stop codon (orange) located in exon 4 is generated by a Cas9/sgHLF  
462 ribonucleoprotein (RNP) complex. This stimulates homologous recombination (HR) with a  
463 single-stranded donor template delivered through rAAV6 infection. The resulting HR event

464 results in a transgenic locus that co-expresses the HLF open reading frame and a  
465 multifunctional ZsGreen (ZsG) expression cassette connected the endogenous *HLF* open  
466 reading frame by an EMCV internal ribosome entry site (ires). Grey boxes, HLF exons; white  
467 boxes, 5' and 3' untranslated regions; 3'/5' HA, homology arms; purple box, puromycin  
468 resistance or truncated EGFR (tEGFR) sequence linked to ZsG by a P2A for optional drug or  
469 antibody mediated selection; WPRE, Woodchuck Hepatitis Virus Post-transcriptional Response  
470 Element; pA, endogenous *HLF* polyadenylation signal.

471 **B-E) Validation of the HLF reporter in human cell lines.** HepG2 (HLF-expressing) and  
472 HEK293 (HLF non-expressing) cells were electroporated with Cas9/sgRNA RNP either as  
473 summarized in (A) or using sgAAVS1 as control. *HLF-ZP*, rAAV6 encoded HLF repair template  
474 driving expression of ZsG and Puromycin resistance. Representative data of two independent  
475 experiments.

476 **B) Droplet digital PCR genotyping of targeted cell lines.** Black dots represent HR-negative  
477 and red dots represent HR-positive PCR droplets. HR percentages (printed in red) were  
478 calculated as HR-positive divided by the total number of specific amplicon-containing droplets  
479 (black and red). Representative data of two independent experiments.

480 **C) ddPCR strategy.** ext. FW, external forward primer binding to a common region outside the 5'  
481 HR; 3' RV (reverse) primer amplifying unrecombined locus; ires RV (reverse) primer amplifying  
482 recombined locus; HR-negative and positive amplicons are detected by a common FAM-labeled  
483 probe and HR-positive amplicons are additionally recognized by a HEX-labeled probe that binds  
484 to the IRES region of the transgene.

485 **D) FACS analysis to detect reporter expression.**

486 **E) HLF expression levels in selected cell lines.** Data curated from Human Protein Atlas<sup>50</sup>.

487 **F) Outline of experimental strategy to optimize reporter integration in CD34<sup>+</sup> cord blood**  
488 **cells.**

489 **G) FACS sorting strategy to enrich/deplete HSCs based on CD201 expression from**  
490 **expanded CD34<sup>+</sup> cells at d3 of culture.**

491 **H) Selective HLF-reporter expression in HSC-containing subfractions of CD34<sup>+</sup> cord**  
492 **blood cell cultures.** HR allele frequencies were determined from one of four replicate wells.

493 Total and ZsG<sup>+</sup> cell counts were determined by FACS on d7 and are normalized to 10e4 cells  
494 plated per 96-well post-electroporation at d4. MOI, multiplicity-of-infection. One of five  
495 independent experiments covering four biological replicates is shown.

496 **I) Effect of TP53 knock-down on HR and cell survival.** CD201<sup>+</sup> cells were sorted and  
497 targeted as in (h) (MOI400), and as an additional condition, electroporated with RNP and siRNA  
498 against TP53. One representative experiment of four independent experiments covering four  
499 biological replicates is shown.

500

501 **3) Selective HLF-Reporter Expression in Human Cord Blood Derived LT-HSC**  
502 **Populations.**

503 Cord blood derived CD34<sup>+</sup> cells were processed as in **Fig. 2F** with the addition of siTP53 and  
504 transduction of rAAV6 *HLF-ZsG P2A tEGFR* at MOI400. One representative experiment of four  
505 independent experiments covering four biological replicates is shown.

506 **A) HR allele frequencies in CD201<sup>+</sup>/ pre-sorted fractions as determined by ddPCR.** Gated  
507 on FAM<sup>+</sup> (common probe) droplets, HEX<sup>+</sup> droplets (red) identify HR allele amplicons.

508 **B-C) Reporter expression in CD201<sup>+</sup>/ pre-sorted fractions.** Aggregated FACS analysis (b)  
509 and summary by repeat (n=4 for CD201<sup>-</sup> and n=5 for CD201<sup>+</sup> sorted, unpaired two-sided t-test  
510 p-value is indicated) in (c).

511 **D-E) Immuno-phenotypes of ex vivo expanded (+UM171) HLF-targeted HSPCs.** FACS  
512 analysis of total (black) versus reporter expressing (green) populations at day 7. Percentages of  
513 increasingly restricted HSC gates are provided for each population. Aggregated FACS data in  
514 (d) and summary by repeat in (e).

515 **F) Dimensional reduction based on FACS analysis.** UMAP reduction using CD34, CD45RA,  
516 CD201, CD90, ITGA3 and ZsG FACS intensities from (d) was calculated and is represented as  
517 2d density plot of all cells (grey, n = 306,797). Cells falling into HSC- or ZsG-gates are  
518 overlaid and color-coded as in (d).

519 **G-H) HLF-reporter expression in immuno-phenotypic HSC gates.** Reverse gating of the  
520 same data as above showing reporter expression in increasingly restricted HSC gates.  
521 Aggregated FACS data from all repeats in (G), summary in (H).

522

#### 523 **4) HLF-Reporter Labels Repopulating Cells in CD34+ Cord Blood Cell Cultures.**

524 **A) FACS plots showing the sorting of HLF-reporter targeted population for**  
525 **transplantation.** *rAAV6 HLF-ZE*: recombinant rAAV6 particle encoding an *HLF* repair template  
526 with ires ZsGreen P2A tEGFR cassette. A pool of eight cord blood units was split into three and  
527 processed as indicated.

528 **B) Summary of transplantation layout.** Transplantation cohorts and cell doses are  
529 represented using the same color-code as in (A).

530 **C) Human engraftment summary of transplanted NSGS recipients.** Human bone marrow  
531 chimerism determined based on human CD45+ cells among total CD45+ (mouse and human)  
532 cells at short (week 3), intermediate (week 9) and long-term (week 16) post-transplantation  
533 timepoints is plotted using the same color code as in (a) and (b). Each recipient mouse is  
534 represented along the x-axis (NSGS-ID). Recipients are arranged by descending average  
535 reconstitution across all timepoints. Recipients #25912, #25914 and #25916 were sacrificed at  
536 week 10 post-transplantation to be used as donors for secondary transplantation (summarized  
537 in **Fig. 5**).

538 **D) Lineage proportion of transplanted recipients.** Bone marrow biopsies were analyzed and  
539 are arranged along timepoints and the individual recipients as in (e). Normalized proportions of

540 B-cells (CD19), myeloid cells (CD33) and T-cells (CD3) within human CD45<sup>+</sup> cells for each  
541 timepoint and recipient are color-coded as indicated.

542 **E) HR allele frequencies in pre-transplanted cell populations.** top panel: ddPCR droplets  
543 are pre-gated based on FAM-positivity, black droplets represent FAM+/HEX- events indicative  
544 of untargeted alleles, red droplets (FAM/HEX double positive) indicate targeted alleles, sub-  
545 sampled to 300 droplets per specimen. bottom panel, quantification summary of HR frequencies  
546 calculated based on targeted/(untargeted+targeted) droplets.

547 **F) ddPCR analysis of bone marrow biopsies at weeks 3, 9 and 16.** Specimens are arranged  
548 as in (C), ddPCR droplets are represented as in (E), sub-sampled to 50 droplets per specimen  
549 and timepoint.

550 **G) HR allele tracing summary.** Summarized data representation of (E) and (F). Dashed red  
551 lines represent allele frequencies at time of transplantation. Bars represent average HR allele  
552 frequencies from (e) with standard error bars, color-codes as in (A-C).  
553 One representative experiment of two independent experiments is summarized.

554

## 555 **5) HLF-Reporter Labels Human HSCs with Extensive Self-Renewal Capacity.**

556 **A) FACS plots of CD34+/HLF-ZsG+ population.** Representative bone marrow biopsies of  
557 reporter-negative (*sgHLF/ rAAV6 HLF-ZE* targeted, ZsG<sup>-</sup> sorted, left) and reporter-positive  
558 (*sgHLF/ rAAV6 HLF-ZE* targeted, ZsG<sup>+</sup> sorted, right panel) primary recipients, gated on human  
559 CD45+.

560 **B) Summary of CD34+/HLF-ZsG+ population.** Population overview of all primary recipients,  
561 pre-gated on human CD45+, recipient mice are arranged according to engraftment levels as in  
562 Fig. 4c.

563 **C) Strategy for secondary transplantation.** Bone marrow of three primary recipients (*sgHLF/*  
564 *rAAV6 HLF-ZE* targeted, ZsG<sup>+</sup> sorted cohort) was pooled and magnetically enriched for human  
565 CD34 expression. Reporter-expressing (ZsG<sup>+</sup>) and non-expressing cells (ZsG<sup>-</sup>) with

566 comparable levels of CD34 expression were sorted for transplantation. Intra-hepatic  
567 transplantation into newborn NSGS recipients as outlined. Corresponding cell doses of HLF-  
568 ZsG+ (n=10) and HLF-ZsG- (n=7) were transplanted.

569 **D) Human engraftment summary of secondary recipients.** Human bone chimerism in  
570 indicated tissues was determined based on human CD45-expressing cells among total (mouse  
571 and human) CD45+ cells at short (week 5, blood), intermediate (week 9, marrow) and long-term  
572 (week 16, marrow and spleen) post-transplantation. Dashed line represents the 0.1% mark used  
573 as cut-off for engraftment positivity. Significance was calculated by unpaired, one-sided  
574 (alternative = “greater”) Wilcoxon test and is provided as p-value for a given comparison.

575 **E) Lineage output of engrafted human cells.** Positive specimens from (D) are shown and  
576 color-coded for B-cells (CD19+), myeloid cells (CD33+) and T-cells (CD3). Normalized for  
577 lineage proportions within human CD45+ cells. Samples with less than 0.1% of human  
578 chimerism are designated negative (neg.).

579

580



581 **Citations:**

582

- 583 1. Till JE, McCulloch EA. A Direct Measurement of the Radiation Sensitivity of Normal  
584 Mouse Bone Marrow Cells. *Radiat. Res.* 1961;14(2):213.
- 585 2. Siminovitch L, McCulloch EA, Till JE. The distribution of colony-forming cells among  
586 spleen colonies. *J Cell Comp Physiol.* 1963;62(3):327–336.
- 587 3. Wu AM, Till JE, Siminovitch L, McCulloch EA. A cytological study of the capacity for  
588 differentiation of normal hemopoietic colony-forming cells. *Journal of Cellular Physiology.*  
589 1967;69(2):177–184.
- 590 4. Wilkinson AC, Igarashi KJ, Nakauchi H. Haematopoietic stem cell self-renewal in vivo  
591 and ex vivo. *Nat Rev Genet.* 2020;132:1–14.
- 592 5. Doulatov S, Notta F, Laurenti E, Dick JE. Hematopoiesis: A Human Perspective. *Cell*  
593 *Stem Cell.* 2012;10(2):120–136.
- 594 6. Dorrell C, Gan OI, Pereira DS, Hawley RG, Dick JE. Expansion of human cord blood  
595 CD34+CD38–cells in ex vivo culture during retroviral transduction without a  
596 corresponding increase in SCID repopulating cell (SRC) frequency: dissociation of SRC  
597 phenotype and function. *Blood.* 2000;95(1):102–110.
- 598 7. Fares I, Chagraoui J, Lehnertz B, et al. EPCR expression marks UM171-expanded  
599 CD34+ cord blood stem cells. *Blood.* 2017;129(25):3344–3351.
- 600 8. Frelin C, Herrington R, Janmohamed S, et al. GATA-3 regulates the self-renewal of long-  
601 term hematopoietic stem cells. *Nat Immunol.* 2013;14(10):1037–1044.
- 602 9. Gazit R, Mandal PK, Ebina W, et al. Fgd5 identifies hematopoietic stem cells in the  
603 murine bone marrow. *J Exp Med.* 2014;211(7):1315–1331.
- 604 10. Acar M, Kocherlakota KS, Murphy MM, et al. Deep imaging of bone marrow shows non-  
605 dividing stem cells are mainly perisinusoidal. *Nature.* 2015;526(7571):126–130.

- 606 11. Chen JY, Miyanishi M, Wang SK, et al. Hoxb5 marks long-term haematopoietic stem cells  
607 and reveals a homogenous perivascular niche. *Nature*. 2016;530(7589):223–227.
- 608 12. Xiang P, Wei W, Hofs N, et al. A knock-in mouse strain facilitates dynamic tracking and  
609 enrichment of MEIS1. *Blood Advances*. 2017;1(24):2225–2235.
- 610 13. Yokomizo T, Watanabe N, Umemoto T, et al. Hlf marks the developmental pathway for  
611 hematopoietic stem cells but not for erythro-myeloid progenitors. *J Exp Med*.  
612 2019;280(2):jem.20181399–320.
- 613 14. Christodoulou C, Spencer JA, Yeh S-CA, et al. Live-animal imaging of native  
614 haematopoietic stem and progenitor cells. *Nature*. 2020;514:1–6.
- 615 15. CRISPR/Cas9  $\beta$ -globin gene targeting in human haematopoietic stem cells. *Nature*.  
616 2016;539(7629):384–389.
- 617 16. Boitano AE, Wang J, Romeo R, et al. Aryl hydrocarbon receptor antagonists promote the  
618 expansion of human hematopoietic stem cells. *Science*. 2010;329(5997):1345–1348.
- 619 17. Fares I, Chagraoui J, Gareau Y, et al. Pyrimidoindole derivatives are agonists of human  
620 hematopoietic stem cell self-renewal. *Science*. 2014;345(6203):1509–1512.
- 621 18. Chaurasia P, Gajzer DC, Schaniel C, D'Souza S, Hoffman R. Epigenetic reprogramming  
622 induces the expansion of cord blood stem cells. *J Clin Invest*. 2014;124(6):2378–2395.
- 623 19. Mantel CR, O'Leary HA, Chitteti BR, et al. Enhancing Hematopoietic Stem Cell  
624 Transplantation Efficacy by Mitigating Oxygen Shock. *Cell*. 2015;161(7):1553–1565.
- 625 20. Bai T, Li J, Sinclair A, et al. Expansion of primitive human hematopoietic stem cells by  
626 culture in a zwitterionic hydrogel. *Nat Med*. 2019;25(10):1566–1575.
- 627 21. Tomellini E, Fares I, Lehnertz B, et al. Integrin- $\alpha$ 3 Is a Functional Marker of Ex Vivo  
628 Expanded Human Long-Term Hematopoietic Stem Cells. *Cell Reports*. 2019;28(4):1063–  
629 1073.e5.
- 630 22. Uhlen M, Karlsson MJ, Zhong W, et al. A genome-wide transcriptomic analysis of protein-  
631 coding genes in human blood cells. *Science*. 2019;366(6472):eaax9198.

- 632 23. Velten L, Haas SF, Raffel S, et al. Human haematopoietic stem cell lineage commitment  
633 is a continuous process. *Nat Cell Biol.* 2017;19(4):271–281.
- 634 24. Haas S, Trumpp A, Milsom MD. Causes and Consequences of Hematopoietic Stem Cell  
635 Heterogeneity. *Cell Stem Cell.* 2018;22(5):627–638.
- 636 25. Zheng S, Papalexi E, Butler A, Stephenson W, Satija R. Molecular transitions in early  
637 progenitors during human cord blood hematopoiesis. *Molecular Systems Biology.*  
638 2018;14(3):e8041.
- 639 26. Calvanese V, Nguyen AT, Bolan TJ, et al. MLLT3 governs human haematopoietic stem-  
640 cell self-renewal and engraftment. *Nature.* 2019;576(7786):1–6.
- 641 27. Aguilo F, Avagyan S, Labar A, et al. Prdm16 is a physiologic regulator of hematopoietic  
642 stem cells. *Blood.* 2011;117(19):5057–5066.
- 643 28. Civin CI, Strauss LC, Brovall C, et al. Antigenic analysis of hematopoiesis. III. A  
644 hematopoietic progenitor cell surface antigen defined by a monoclonal antibody raised  
645 against KG-1a cells. *J Immunol.* 1984;133(1):157–165.
- 646 29. Yin AH, Miraglia S, Zanjani ED, et al. AC133, a Novel Marker for Human Hematopoietic  
647 Stem and Progenitor Cells. *Blood.* 1997;90(12):5002–5012.
- 648 30. Baum CM, Weissman IL, Tsukamoto AS, Buckle AM, Peault B. Isolation of a candidate  
649 human hematopoietic stem-cell population. *Proc Natl Acad Sci USA.* 1992;89(7):2804–  
650 2808.
- 651 31. Notta F, Doulatov S, Laurenti E, et al. Isolation of Single Human Hematopoietic Stem  
652 Cells Capable of Long-Term Multilineage Engraftment. *Science.* 2011;333(6039):218–  
653 221.
- 654 32. Hay SB, Ferchen K, Chetal K, Grimes HL, Salomonis N. The Human Cell Atlas bone  
655 marrow single-cell interactive web portal. *Exp Hematol.* 2018;68:51–61.
- 656 33. Popescu D-M, Botting RA, Stephenson E, et al. Decoding human fetal liver  
657 haematopoiesis. *Nature.* 2019;574(7778):365–371.

- 658 34. Komorowska K, Doyle A, Wahlestedt M, et al. Hepatic Leukemia Factor Maintains  
659 Quiescence of Hematopoietic Stem Cells and Protects the Stem Cell Pool during  
660 Regeneration. *Cell Reports*. 2017;21(12):3514–3523.
- 661 35. Wahlestedt M, Ladopoulos V, Hidalgo I, et al. Critical Modulation of Hematopoietic  
662 Lineage Fate by Hepatic Leukemia Factor. *Cell Reports*. 2017;21(8):2251–2263.
- 663 36. Garg S, Reyes-Palomares A, He L, et al. Hepatic leukemia factor is a novel leukemic  
664 stem cell regulator in DNMT3A, NPM1, and FLT3-ITD triple-mutated AML. *Blood*.  
665 2019;134(3):263–276.
- 666 37. Bak RO, Dever DP, Porteus MH. CRISPR/Cas9 genome editing in human hematopoietic  
667 stem cells. *Nature protocols*. 2018;13(2):358–376.
- 668 38. Wang X, Chang WC, Wong CW, et al. A transgene-encoded cell surface polypeptide for  
669 selection, in vivo tracking, and ablation of engineered cells. *Blood*. 2011;118(5):1255–  
670 1263.
- 671 39. Charlesworth CT, Camarena J, Cromer MK, et al. Priming Human Repopulating  
672 Hematopoietic Stem and Progenitor Cells for Cas9/sgRNA Gene Targeting. *Mol Ther*  
673 *Nucleic Acids*. 2018;12:89–104.
- 674 40. Schioli G, Conti A, Ferrari S, et al. Precise Gene Editing Preserves Hematopoietic Stem  
675 Cell Function following Transient p53-Mediated DNA Damage Response. *Cell Stem Cell*.  
676 2019;24(4):551–565.e8.
- 677 41. Inaba T, Roberts WM, Shapiro LH, et al. Fusion of the leucine zipper gene HLF to the  
678 E2A gene in human acute B-lineage leukemia. *Science*. 1992;257(5069):531–534.
- 679 42. Riddell J, Gazit R, Garrison BS, et al. Reprogramming committed murine blood cells to  
680 induced hematopoietic stem cells with defined factors. *Cell*. 2014;157(3):549–564.
- 681 43. Dever DP, Bak RO, Reinisch A, et al. CRISPR/Cas9  $\beta$ -globin gene targeting in human  
682 haematopoietic stem cells. *Nature*. 2016;539(7629):384–389.

- 683 44. Cromer MK, Vaidyanathan S, Ryan DE, et al. Global Transcriptional Response to  
684 CRISPR/Cas9-AAV6-Based Genome Editing in CD34+ Hematopoietic Stem and  
685 Progenitor Cells. *Mol Ther.* 2018;26(10):2431–2442.
- 686 45. van Haasteren J, Li J, Scheideler OJ, Murthy N, Schaffer DV. The delivery challenge:  
687 fulfilling the promise of therapeutic genome editing. *Nature Biotechnology.*  
688 2020;38(7):845–855.
- 689 46. Ferrari S, Jacob A, Beretta S, et al. Efficient gene editing of human long-term  
690 hematopoietic stem cells validated by clonal tracking. *Nature Biotechnology.* 2020;83:1–  
691 11.
- 692 47. Stuart T, Butler A, Hoffman P, et al. Comprehensive Integration of Single-Cell Data. *Cell.*  
693 2019;177(7):1888–1902.e21.
- 694 48. Weinreb C, Wolock S, Klein AM. SPRING: a kinetic interface for visualizing high  
695 dimensional single-cell expression data. *Bioinformatics.* 2018;34(7):1246–1248.
- 696 49. van Dijk D, Sharma R, Nainys J, et al. Recovering Gene Interactions from Single-Cell  
697 Data Using Data Diffusion. *Cell.* 2018;174(3):716–729.e27.
- 698 50. Thul PJ, Åkesson L, Wiking M, et al. A subcellular map of the human proteome. *Science.*  
699 2017;356(6340):eaal3321.

# Fig. 1: Specific Expression of *HLF* in enriched human HSC populations.

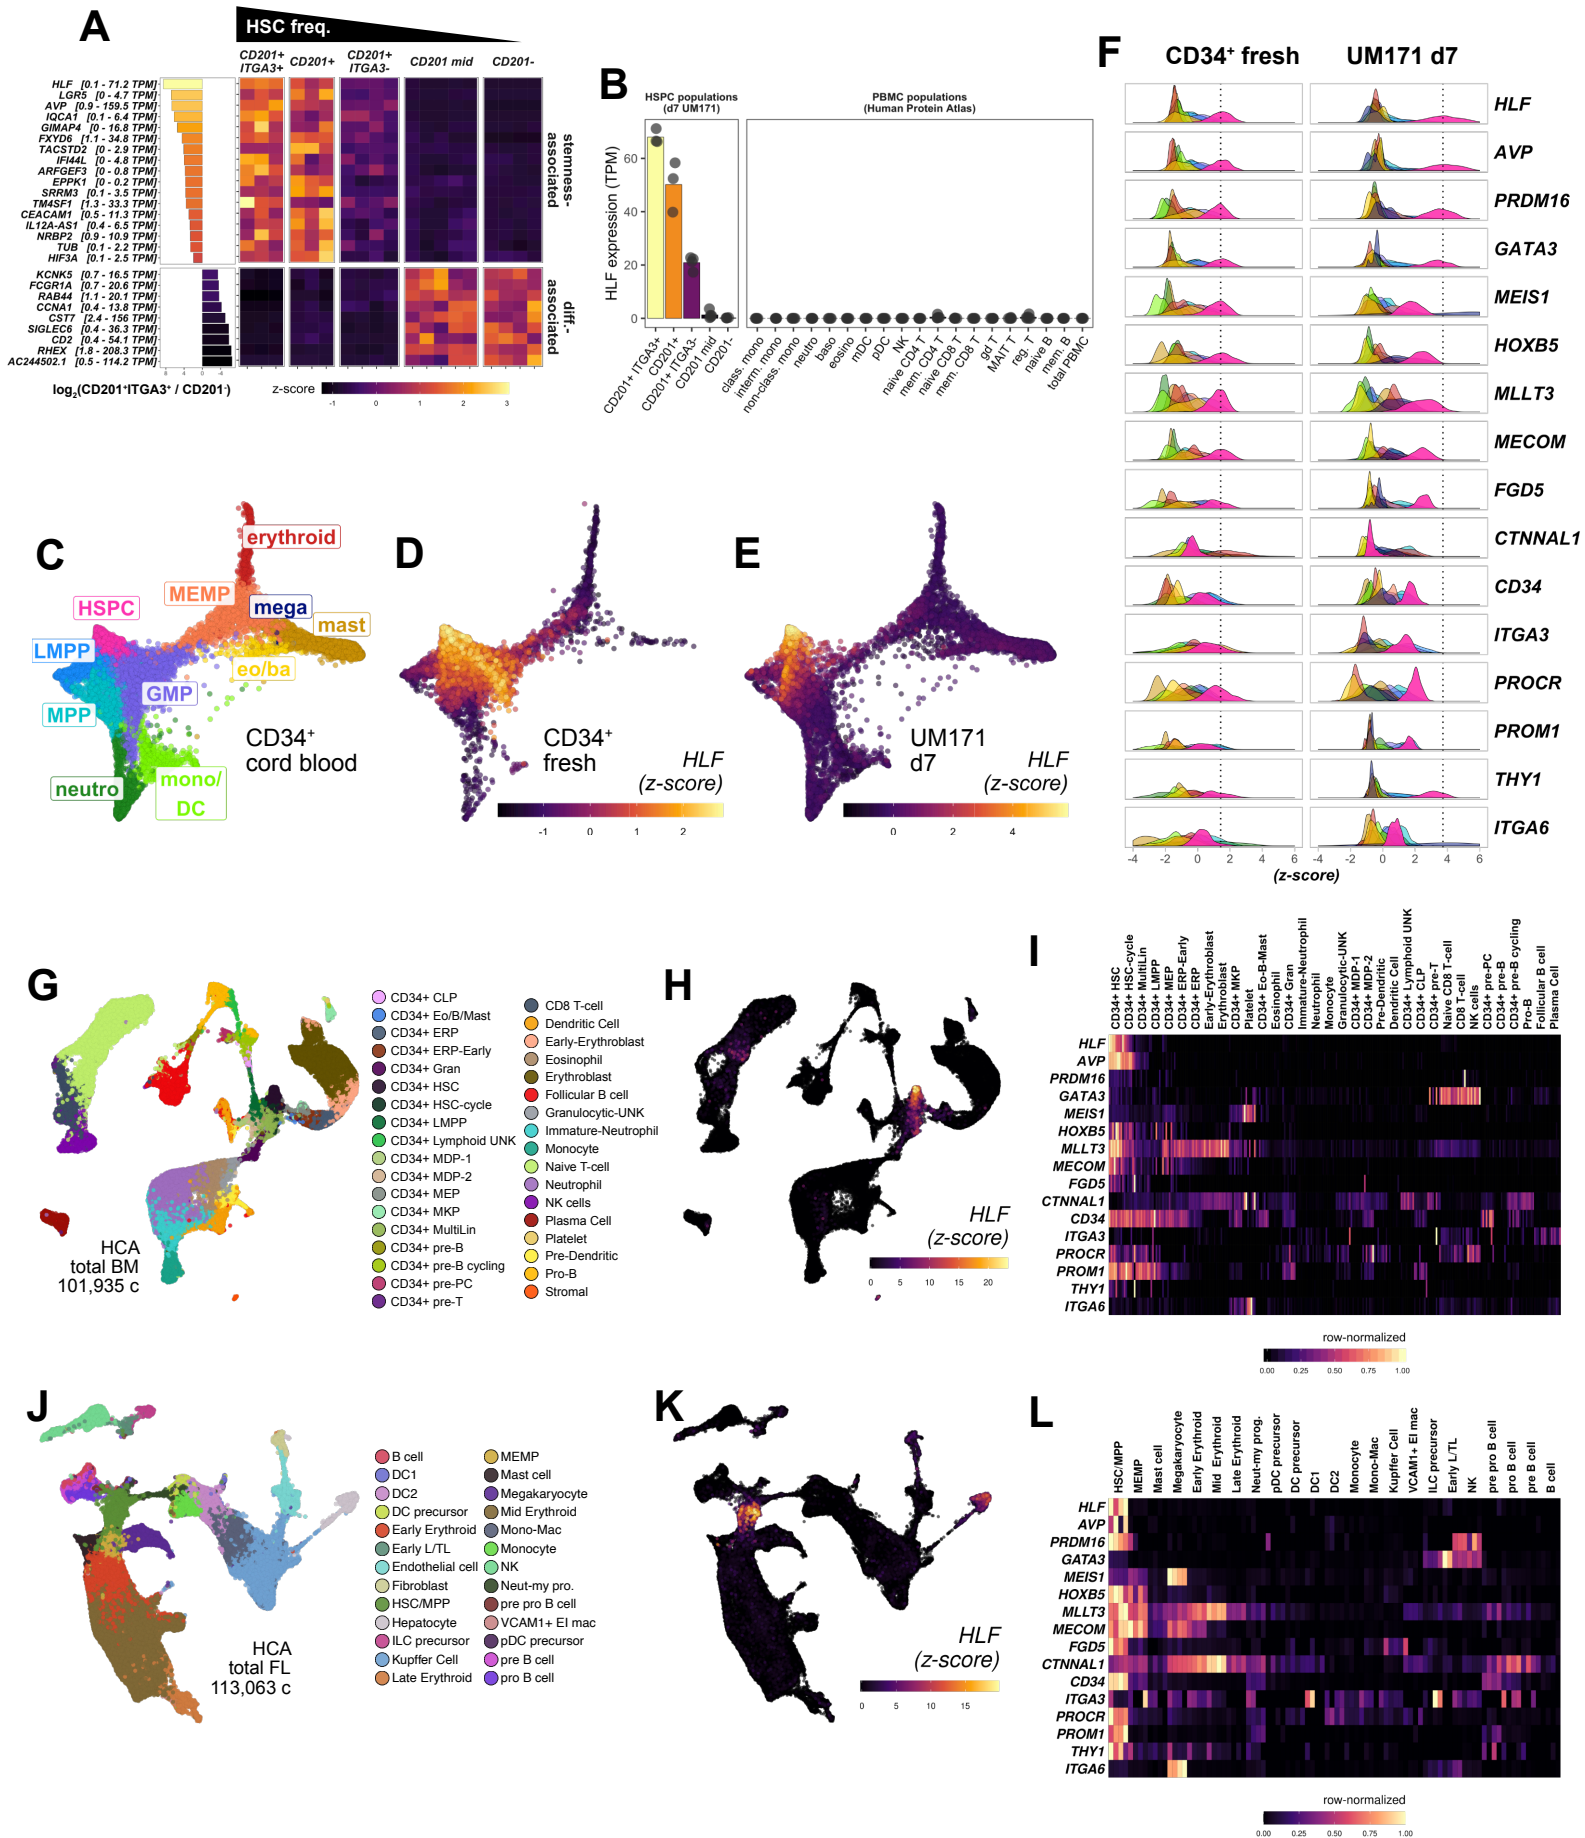



## Fig. 2: Engineering of an HLF-reporter transgene in human cells.

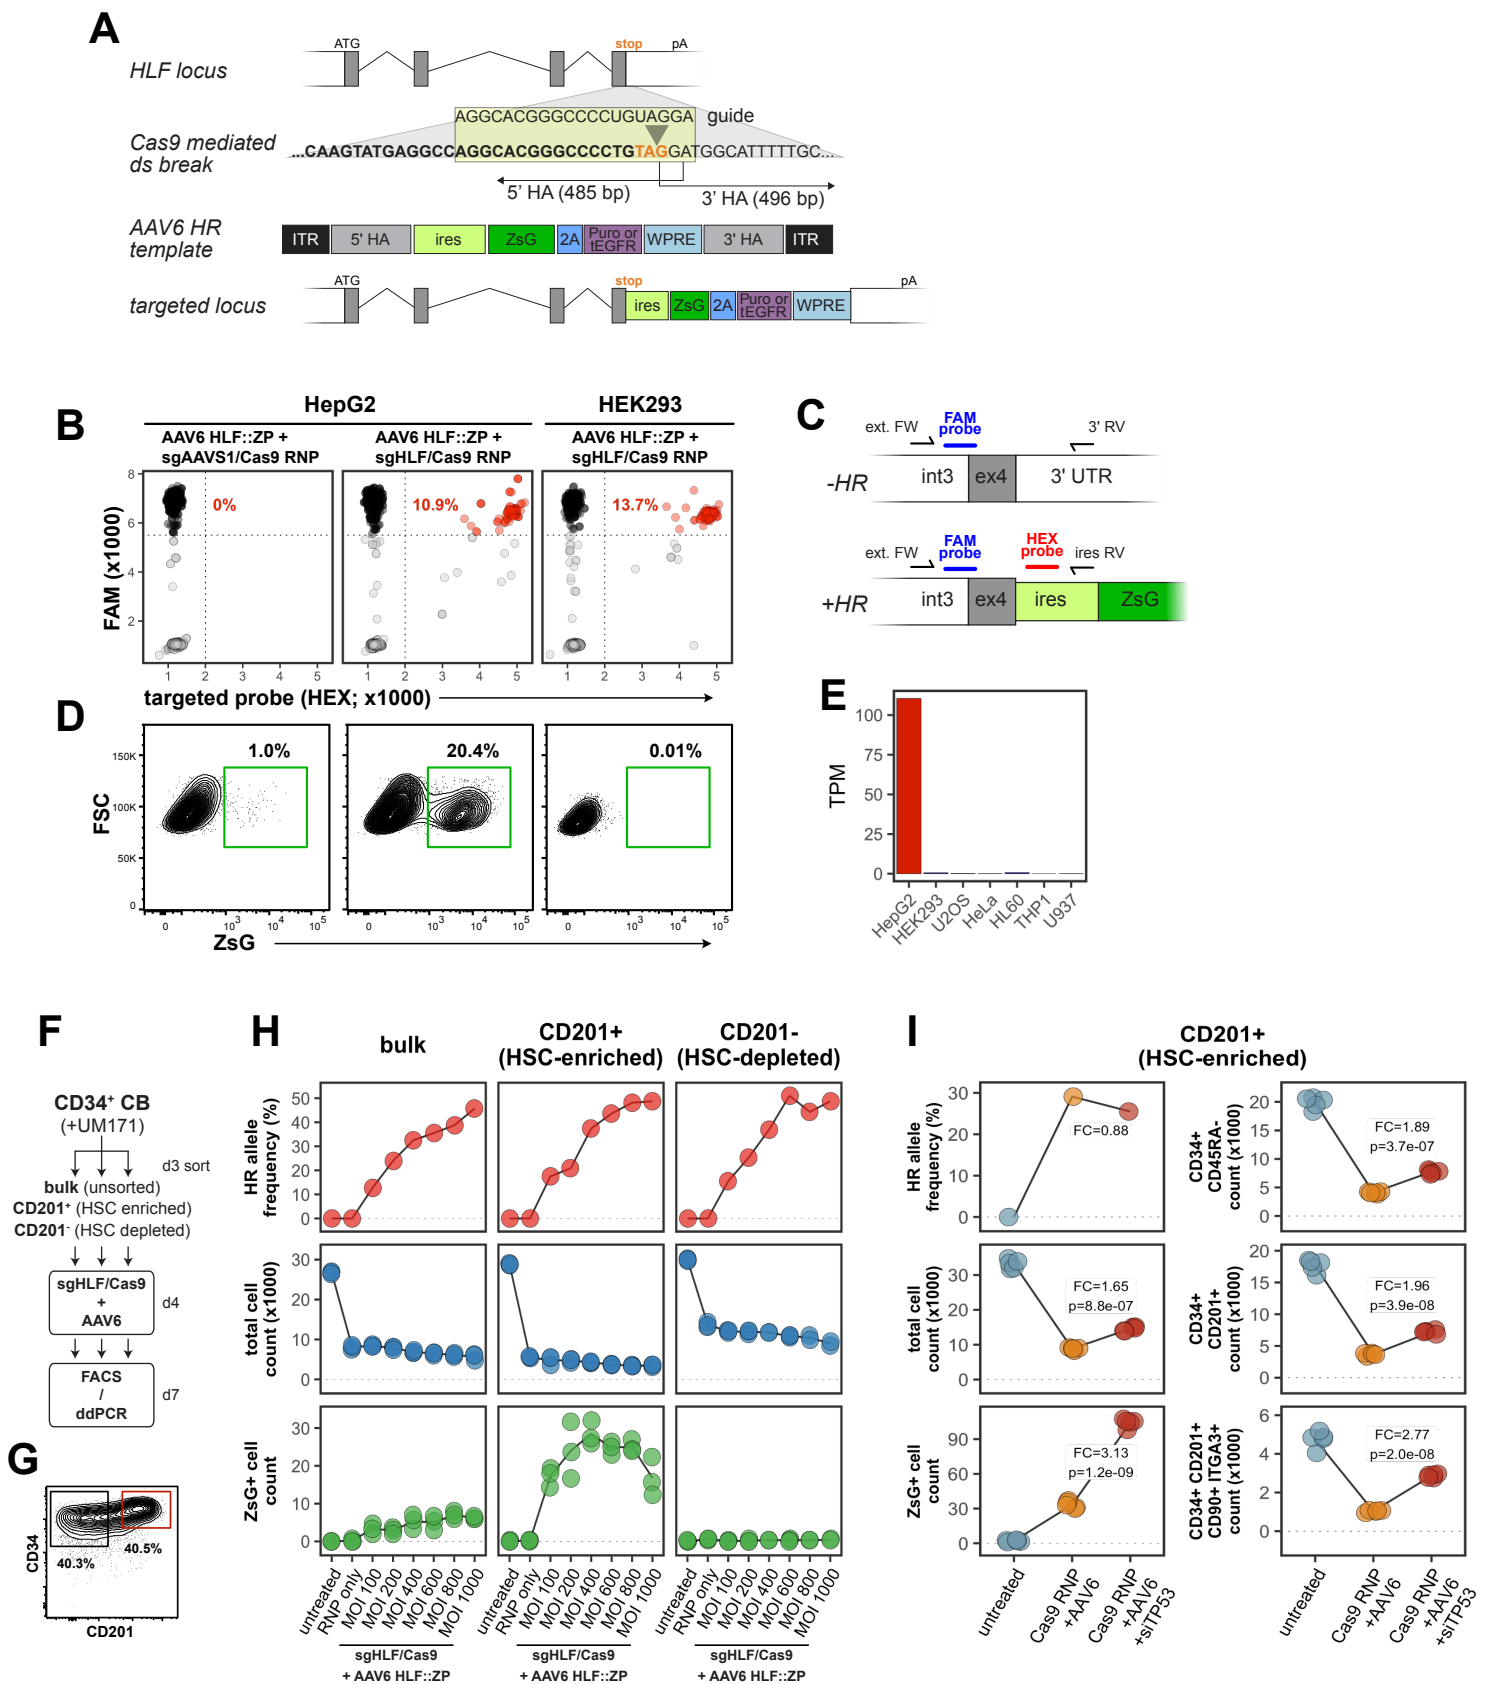

**Fig. 3: Selective *HLF*-transgene expression in immunophenotypic human LT-HSC populations.**

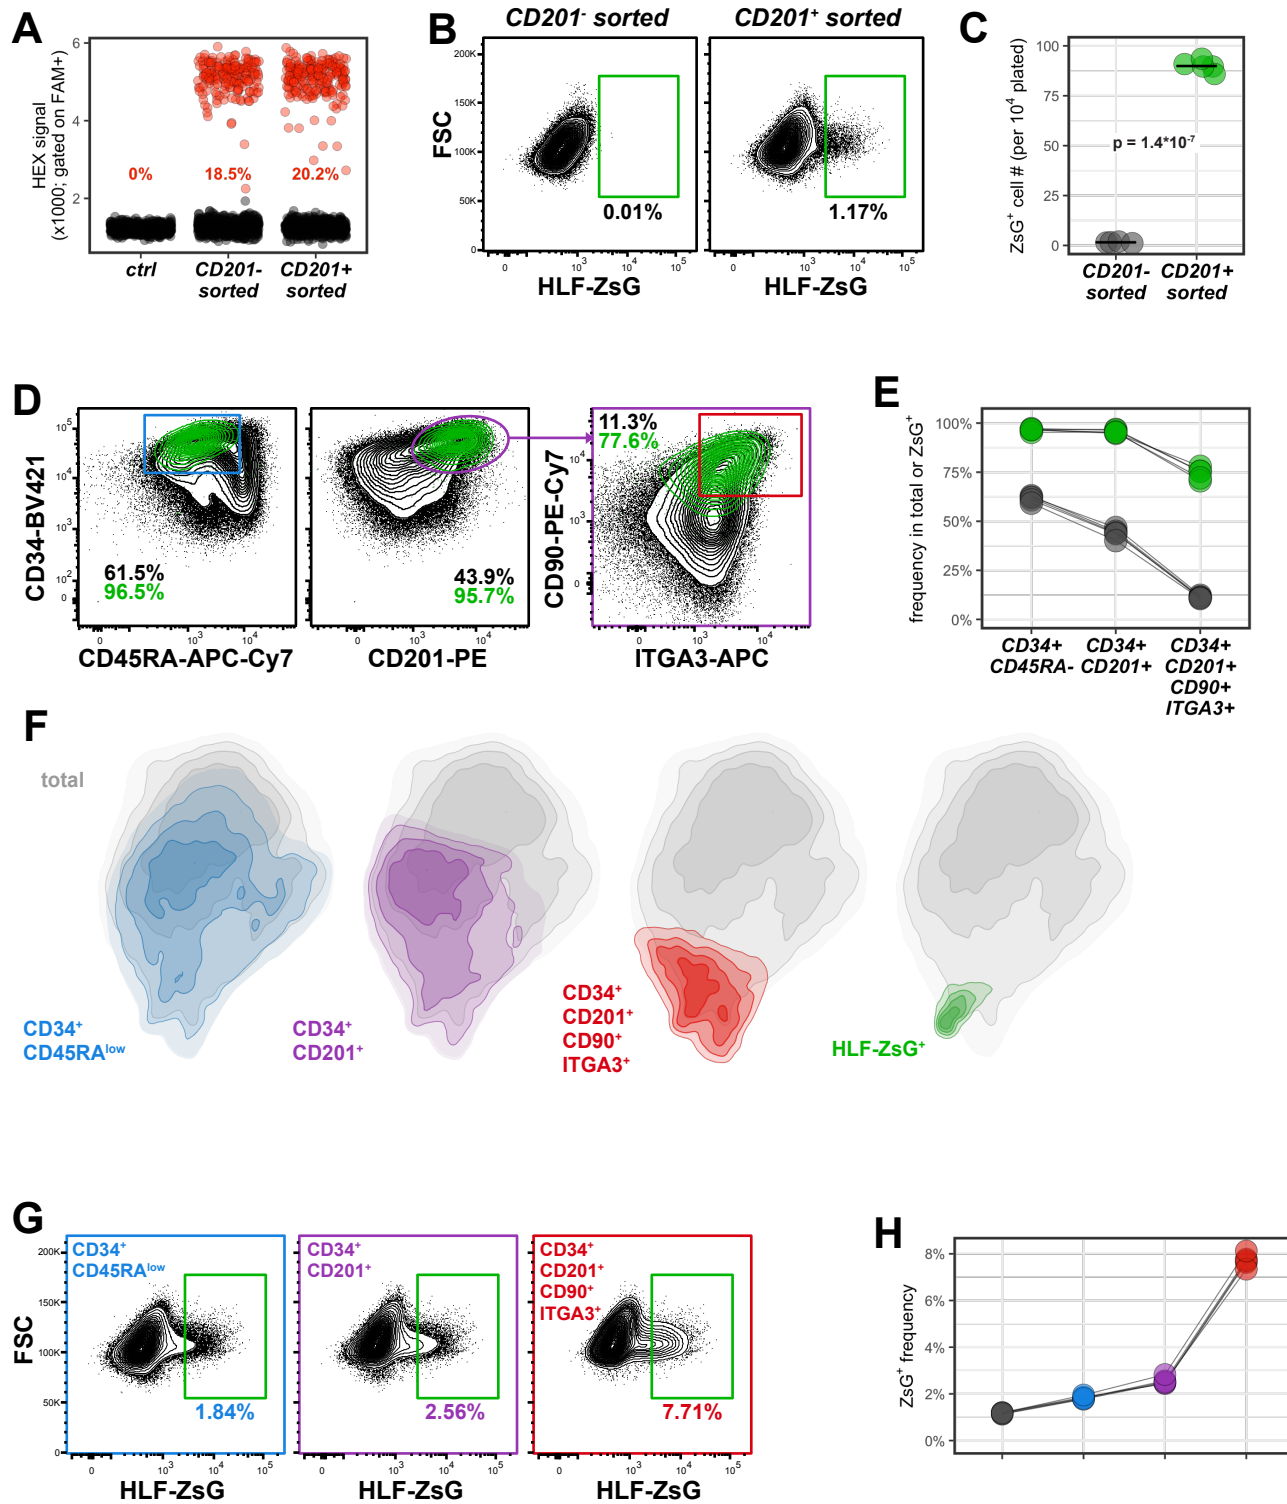



**Fig. 4: HLF expression distinguishes repopulating cells in CD34+ cord blood cultures.**

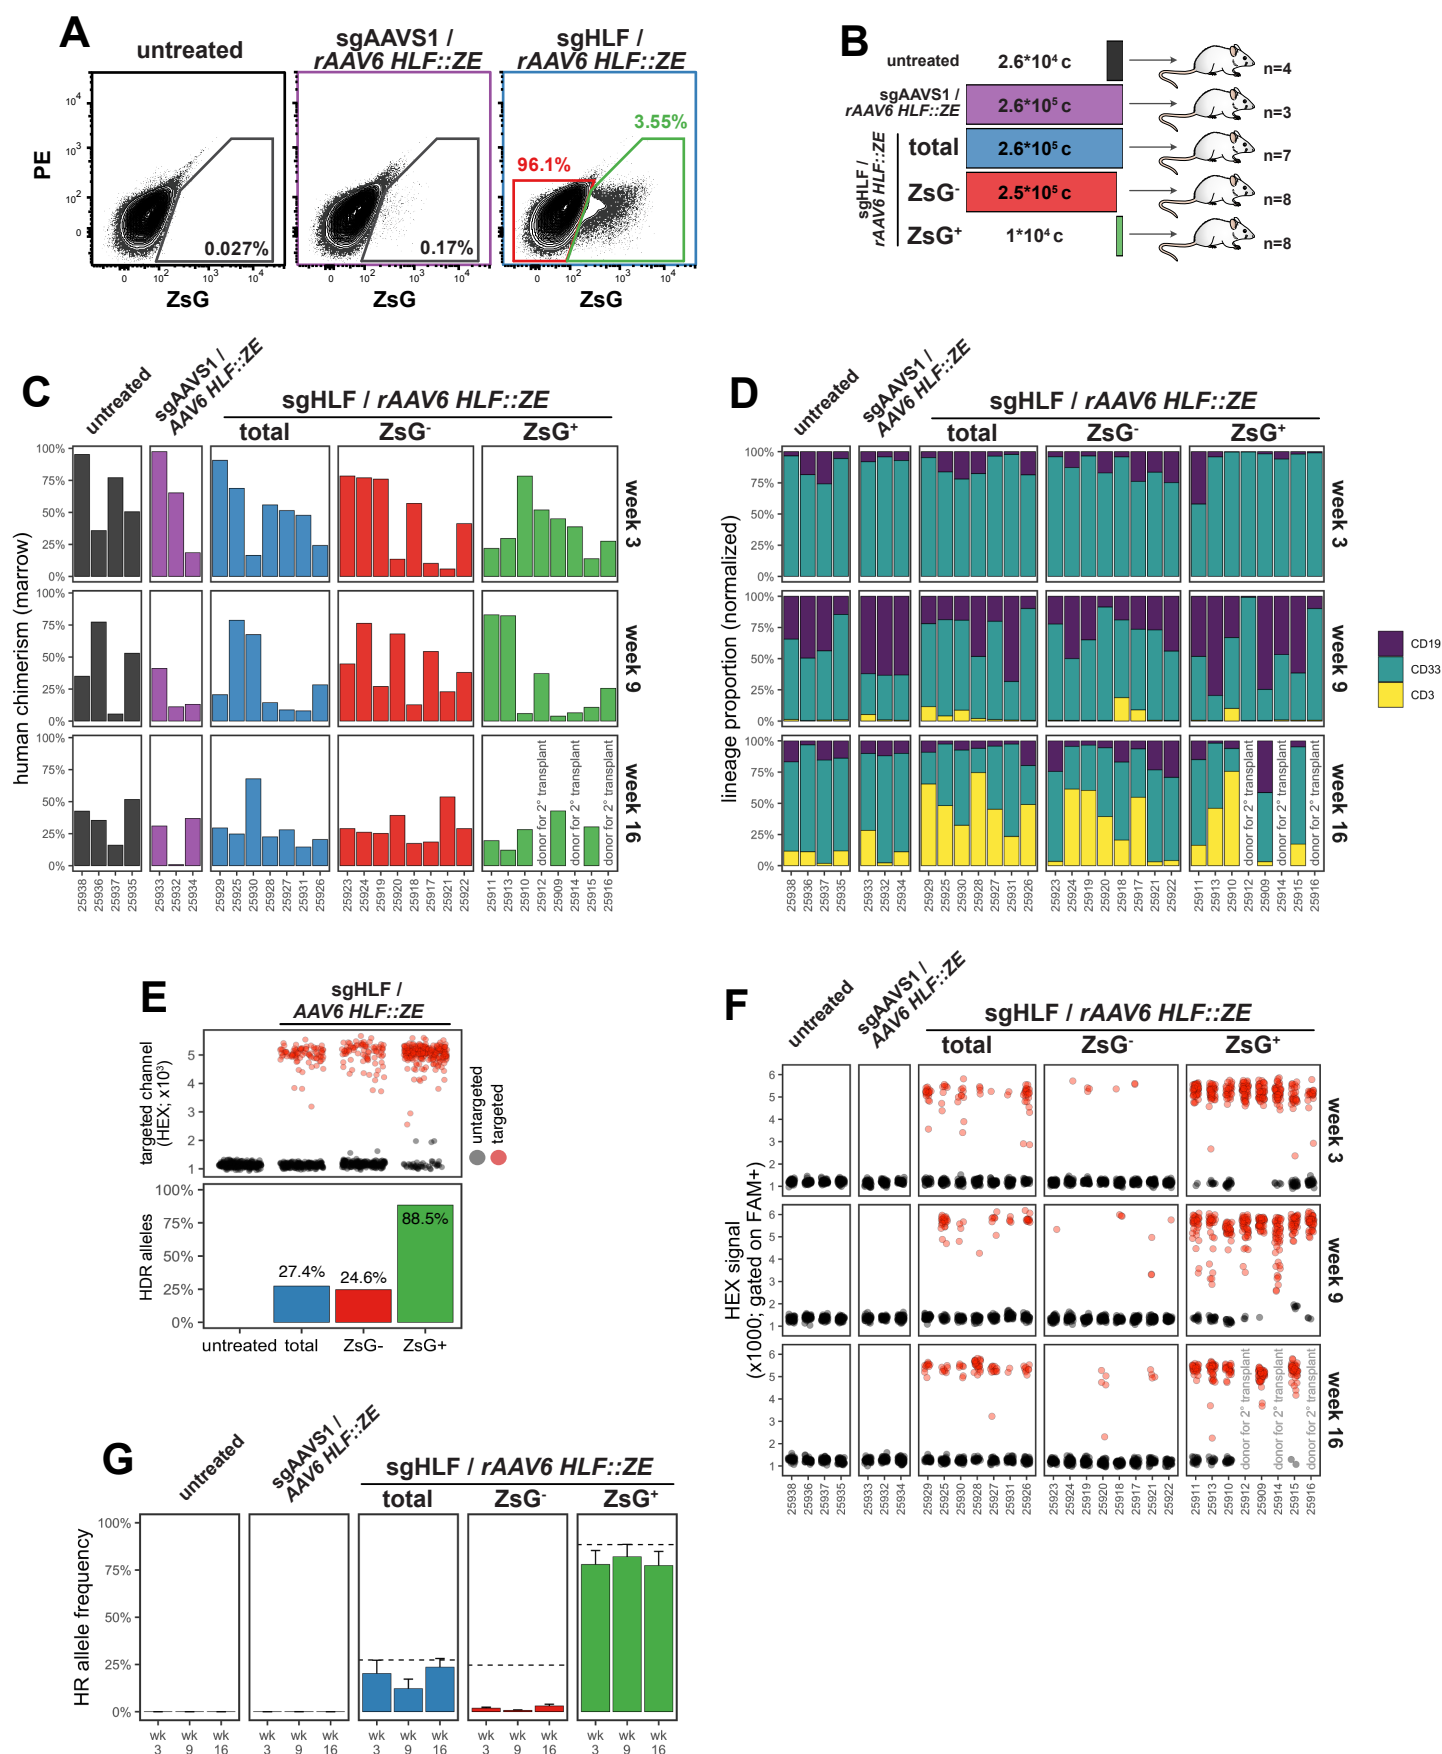

**Fig. 5: HLF-expression labels HSCs with extensive self-renewal capacity.**

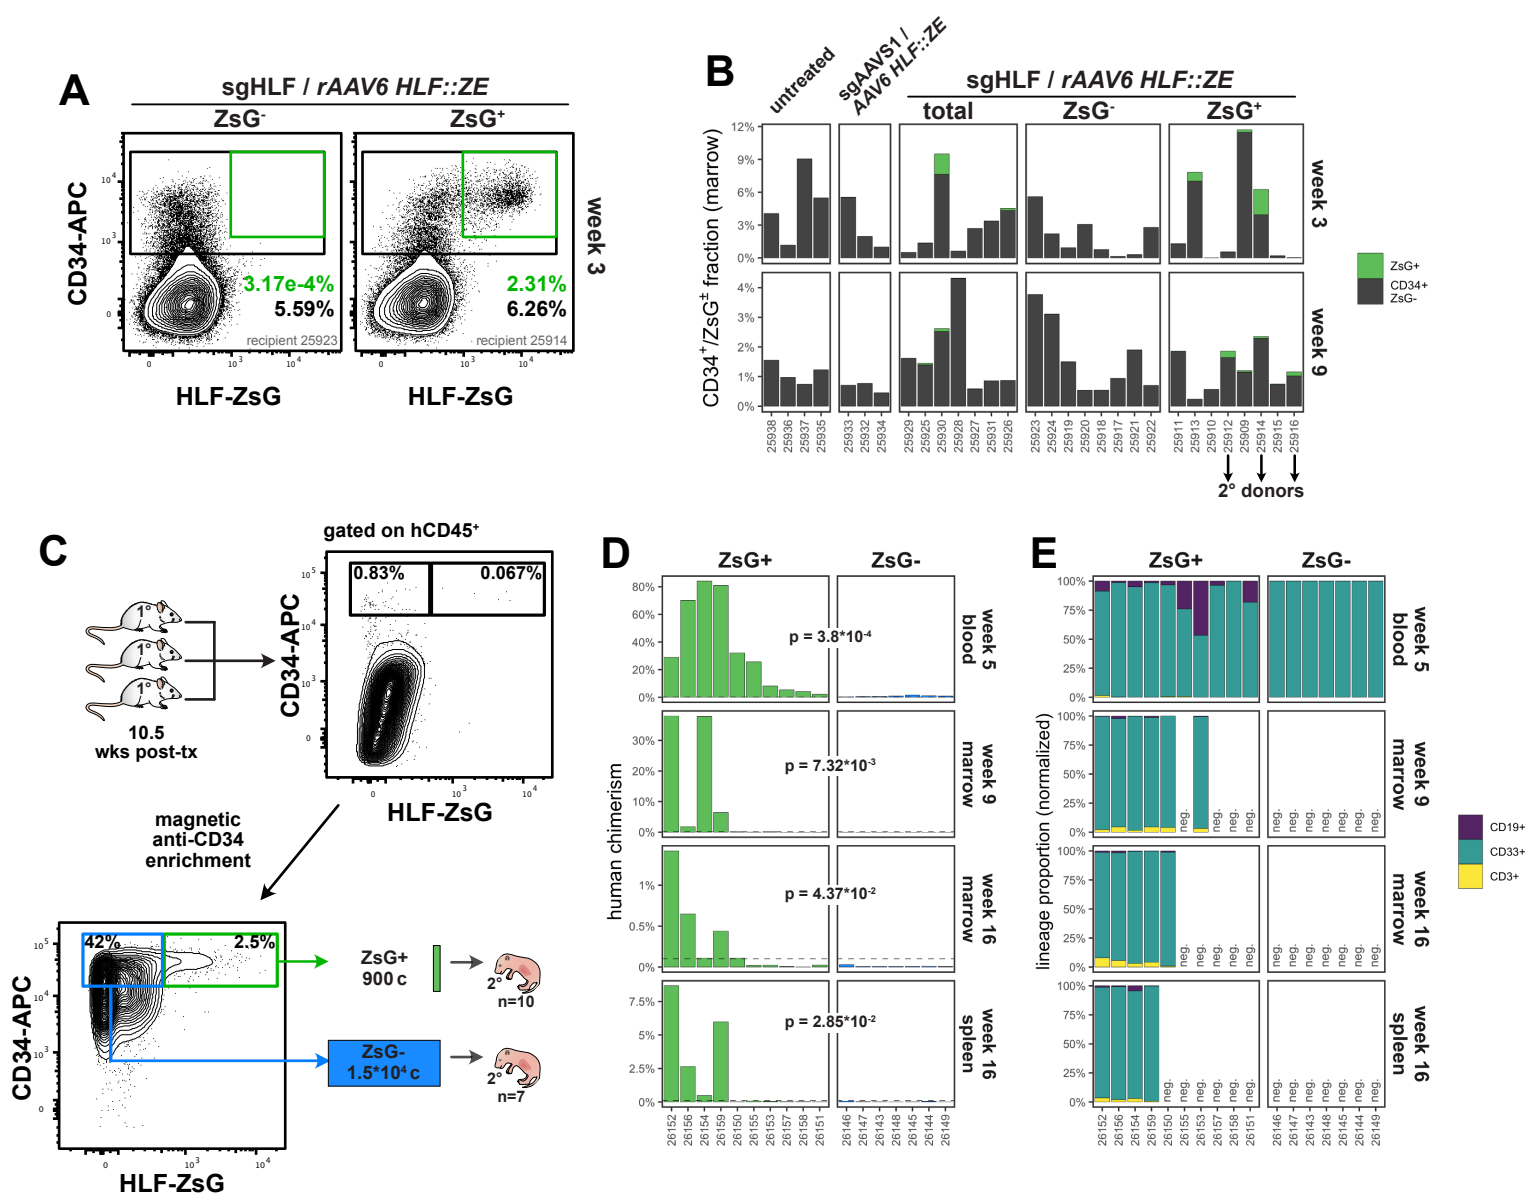

Source: https://www.biorxiv.org/content/10.1101/2020.06.29.177709v2.full.pdf
